# Supplementary material
Source: PubMed Central journal article supplement (PMC1413720)

A

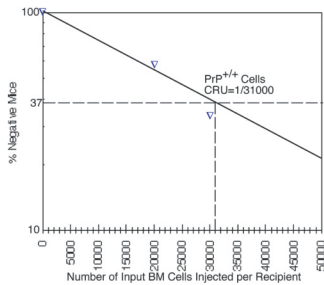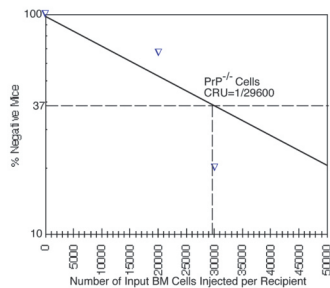

B

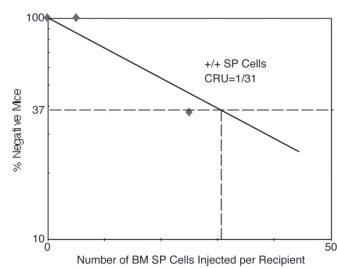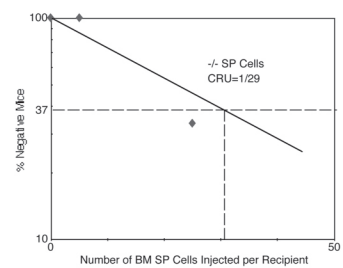

C

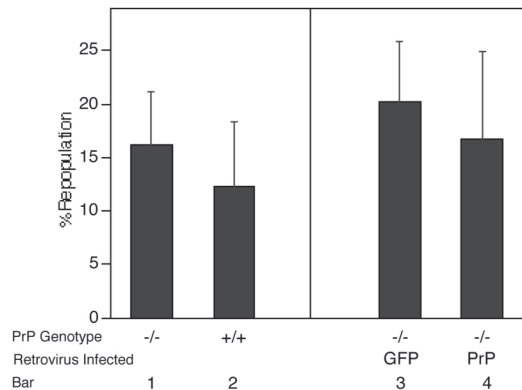

D

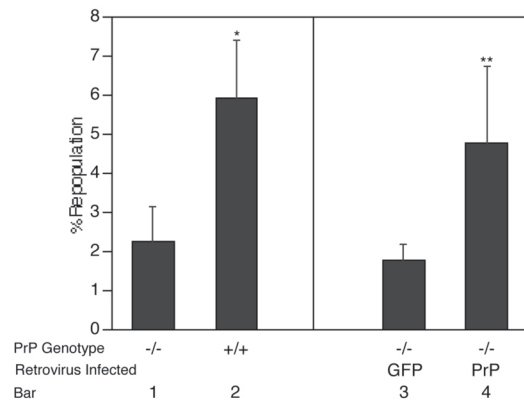

Supplement: pnas_0510577103_1.pdf [file pnas_0510577103_1.pdf]
